# Supplementary material
Source: Springer Nature journal article supplement (https://www.springermedizin.de/resource/supplementary/12936_2013_2883_MOESM13_ESM.pdf/9544476)

Incidence rate (case/month/1000 population)

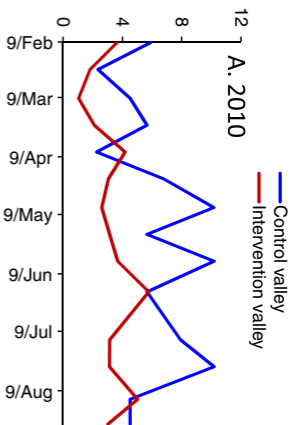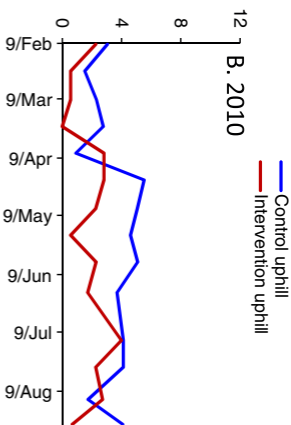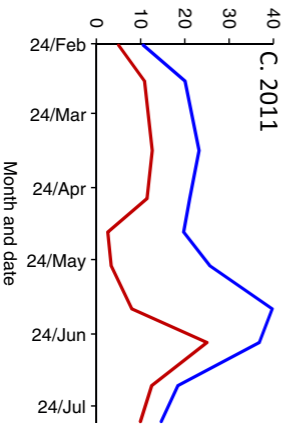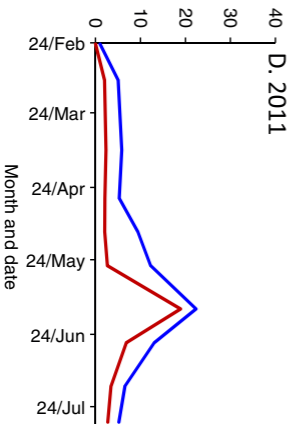

Supplement: MOESM13 [file 9544476]
